# Supplementary material for: Electrochemical evaluation of anodic galvanized-iron nanoparticles as electrode materials for supercapacitors
Source: Royal Society of Chemistry journal article supplement (doi:10.1039/d5ma01224d), 2025-11-03
Supplement: d5ma01224d1.pdf [file d5ma01224d1.pdf]

## **Supplementary Information**

### **Electrochemical Evaluation of Anodic Galvanized-Iron**

### **Nanoparticles as Electrode Materials for Supercapacitors**

Muhammad Haseem Bhatti<sup>1</sup>, Muhammad Danish<sup>1</sup>, Jawad Ahmad<sup>1</sup>, Wasif Ali<sup>2</sup>, Maaz Khan<sup>1</sup>,  
Mashkoor Ahmad<sup>1</sup>, Ghafar Ali<sup>1\*</sup>, Muhammad Nadeem<sup>3</sup>, Nasir Mehboob<sup>4</sup>, Imran Shakir<sup>5</sup>

<sup>1</sup>Nanomaterials Research Group, Physics Division, PINSTECH, Islamabad 45650, Pakistan

<sup>2</sup>Department of Physics, Abdul Wali Khan University Mardan, KPK, Pakistan

<sup>3</sup>Nuclear Engineering Division, PINSTECH, Islamabad 45650, Pakistan

<sup>4</sup>Ripah International University, Islamabad, Pakistan

<sup>5</sup>Department of Physics, Faculty of Science, Islamic University of Madinah, Madinah 42351,  
Saudi Arabia

\* E-mail: [ghafarali@kaist.ac.kr](mailto:ghafarali@kaist.ac.kr),

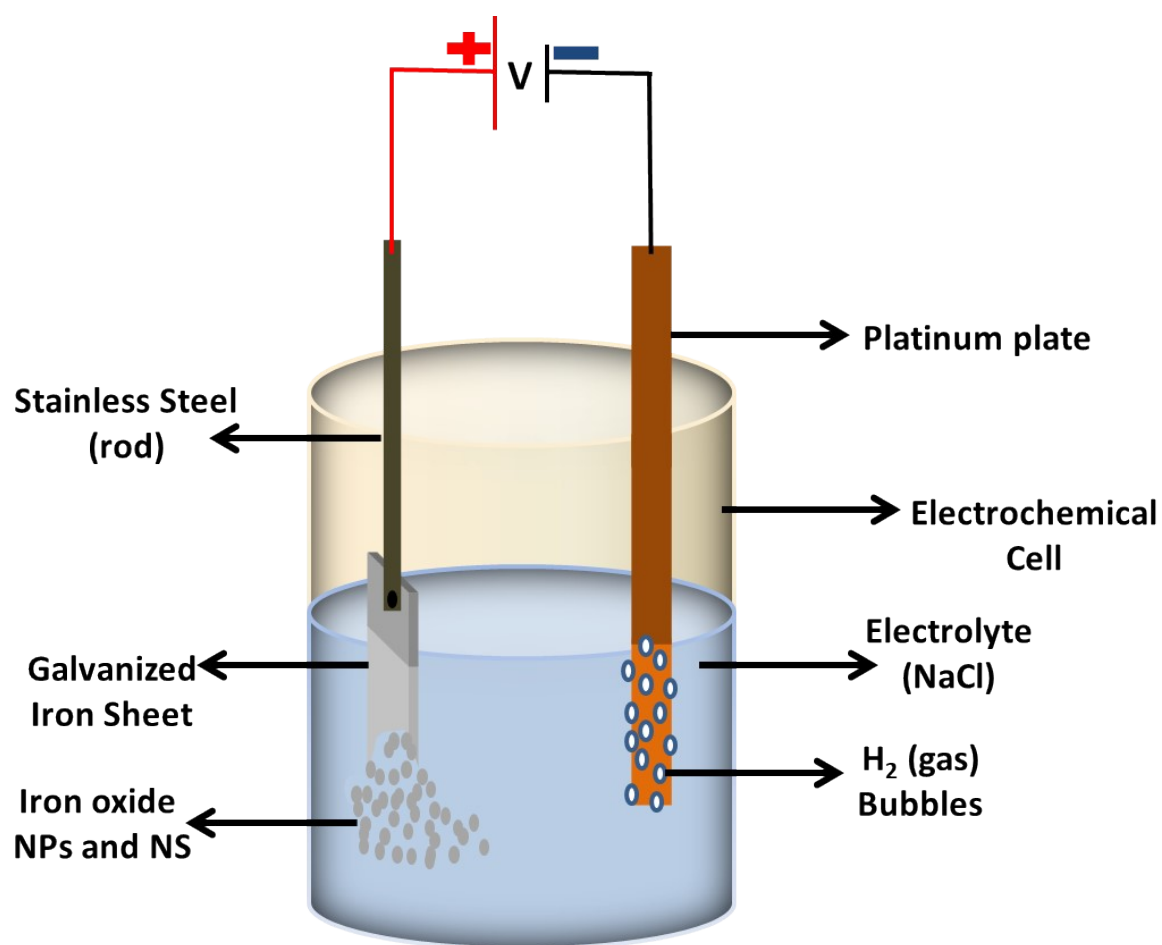

**Figure S1:** Schematic diagram showing the experimental set-up for the production of the  $\text{Fe}_2\text{O}_3$  nanoparticles in 1M NaCl electrolyte at room temperature.

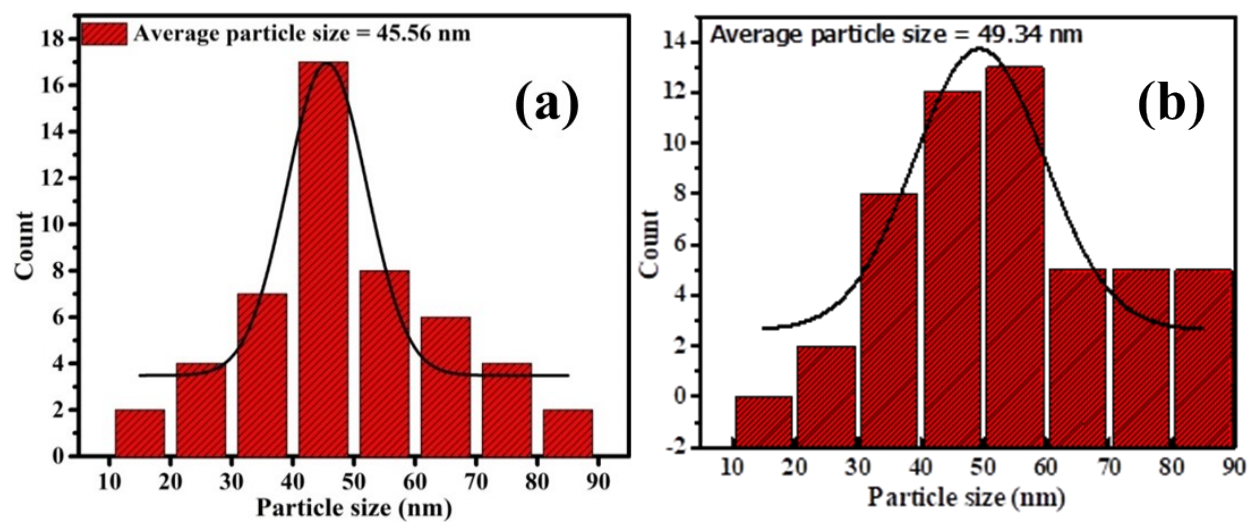

**Figure S2:** Histogram of the (a) pure iron-oxide NPs, and (b) GI-oxide NPs.

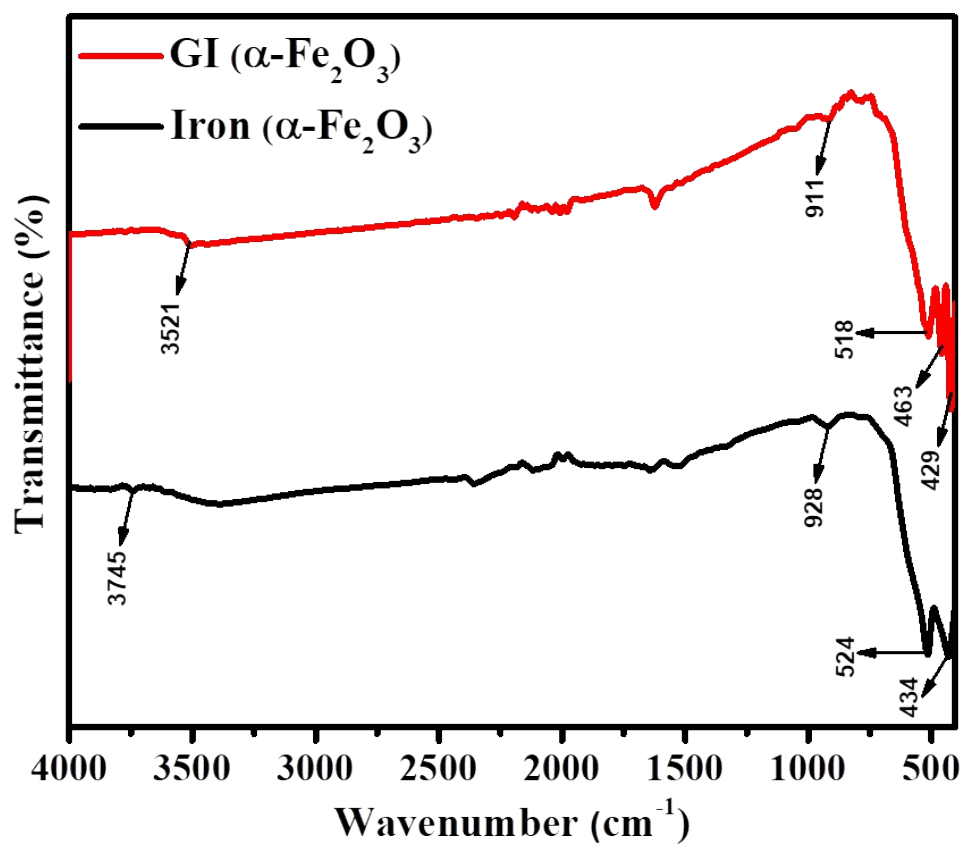

**Figure S3:** FTIR spectra of GI-oxide and the pure iron-oxide NPs.

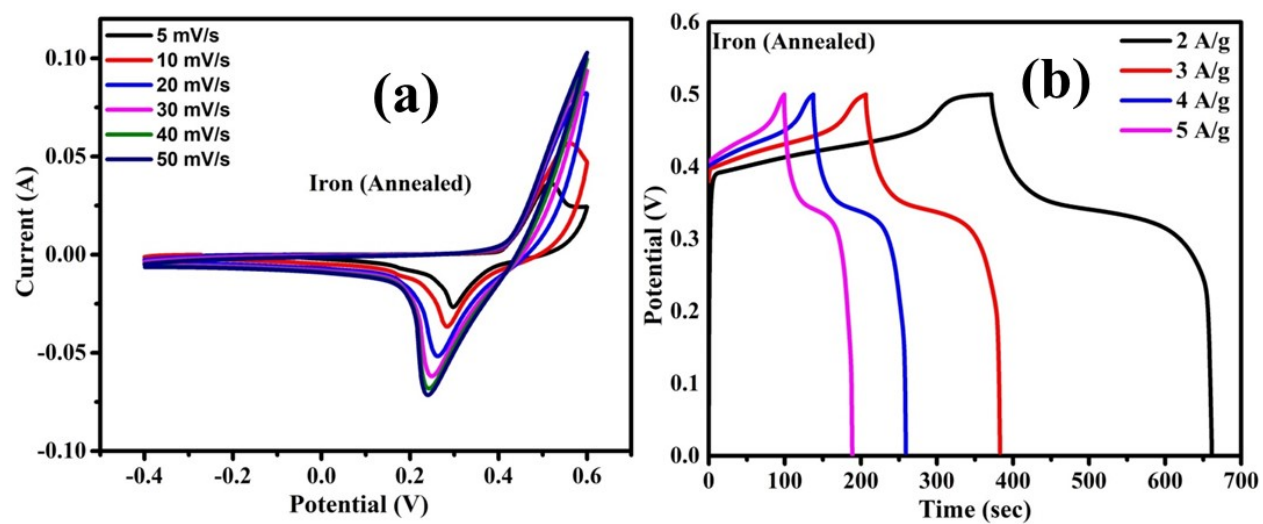

**Figure S4:** CV (a) and GCD (b) response of the pure iron-oxide NPs electrode.

**Table S1:** Comparison between GI-oxide electrode and iron-oxide electrode.

| Current density<br>(A/g)                    | 2                    |                    | 3                    |                    | 4                    |                    | 5                    |                    |
|---------------------------------------------|----------------------|--------------------|----------------------|--------------------|----------------------|--------------------|----------------------|--------------------|
| Materials                                   | G-iron<br>(Annealed) | Iron<br>(Annealed) | G-iron<br>(Annealed) | Iron<br>(Annealed) | G-iron<br>(Annealed) | Iron<br>(Annealed) | G-iron<br>(Annealed) | Iron<br>(Annealed) |
| Specific capacitance<br>(Fg <sup>-1</sup> ) | 694                  | 586                | 639                  | 531                | 584                  | 484                | 555                  | 450                |
| Energy density<br>(Wh/kg)                   | 24.09                | 20.34              | 22.18                | 18.43              | 20.27                | 16.80              | 19.27                | 15.62              |
| Power density<br>(Wkg <sup>-1</sup> )       | 252.83               | 252.49             | 374.87               | 374.84             | 499.80               | 499.83             | 624.97               | 624.8              |
